# Supplementary material for: Fecal Viral Diversity of Captive and Wild Tasmanian Devils Characterized Using Virion-Enriched Metagenomics and Metatranscriptomics
Source: PubMed Central journal article supplement (PMC6532096; doi:10.1128/jvi.00205-19), 2019-05-15
Supplement: JVI.00205-19-s0004.pdf [file JVI.00205-19-s0004.pdf]

1 **Supplemental material**

2 **Fig. S1.** Maximum likelihood phylogenetic tree of Dasyurid herpesvirus 3 in the context of  
3 representatives of the *Herpesviridae* family based on the amino acid sequences of  
4 glycoprotein M. The tree is mid-point rooted and scaled to the number of amino acid  
5 substitutions per site. Bootstrap values (>80%) are shown at the key nodes. The newly  
6 discovered Dasyurid herpesvirus 3 is shown in red.

7 **Fig. S2.** Maximum likelihood phylogenetic tree of Dasyurid herpesvirus 3 in the context of  
8 representatives of the *Herpesviridae* family based on the amino acid sequences of major  
9 capsid. The tree is mid-point rooted and scaled to the number of amino acid substitutions  
10 per site. Bootstrap values (>80%) are shown at the key nodes. The newly discovered  
11 DaHV-3 is shown in red.

12 **Fig. S3.** Maximum likelihood phylogenetic tree of Tasmanian devil-associated  
13 papillomavirus 1 and 2 in the context of representatives of the *Papillomaviridae* family  
14 based on the amino acid sequences of E1 protein. The tree is mid-point rooted and scaled  
15 to the number of amino acid substitutions per site. Bootstrap values (>80%) are shown at  
16 the key nodes. The 2 newly discovered papillomaviruses is shown in red.

17 **Fig. S4.** Maximum likelihood phylogenetic tree of Tasmanian devil-associated polyomavirus  
18 1 in the context of representatives of the *Polyomaviridae* family based on the amino acid  
19 sequences of VP1. The tree is mid-point rooted and scaled to the number of amino acid  
20 substitutions per site. Bootstrap values (>80%) are shown at the key nodes. The newly  
21 discovered polyomavirus is shown in red.

22 **Fig. S5.** Maximum likelihood phylogenetic tree of Tasmanian devil-associated polyomavirus  
23 1 and Tasmanian devil-associated polyoma-like virus 2 in the context of representatives of  
24 the *Polyomaviridae* family based on the amino acid sequences of the large T antigen. The  
25 tree is mid-point rooted and scaled to the number of amino acid substitutions per site.  
26 Bootstrap values (>80%) are shown at the key nodes. The 2 newly discovered viruses are  
27 shown in red.

28

29

Fig. S1

Glycoprotein M

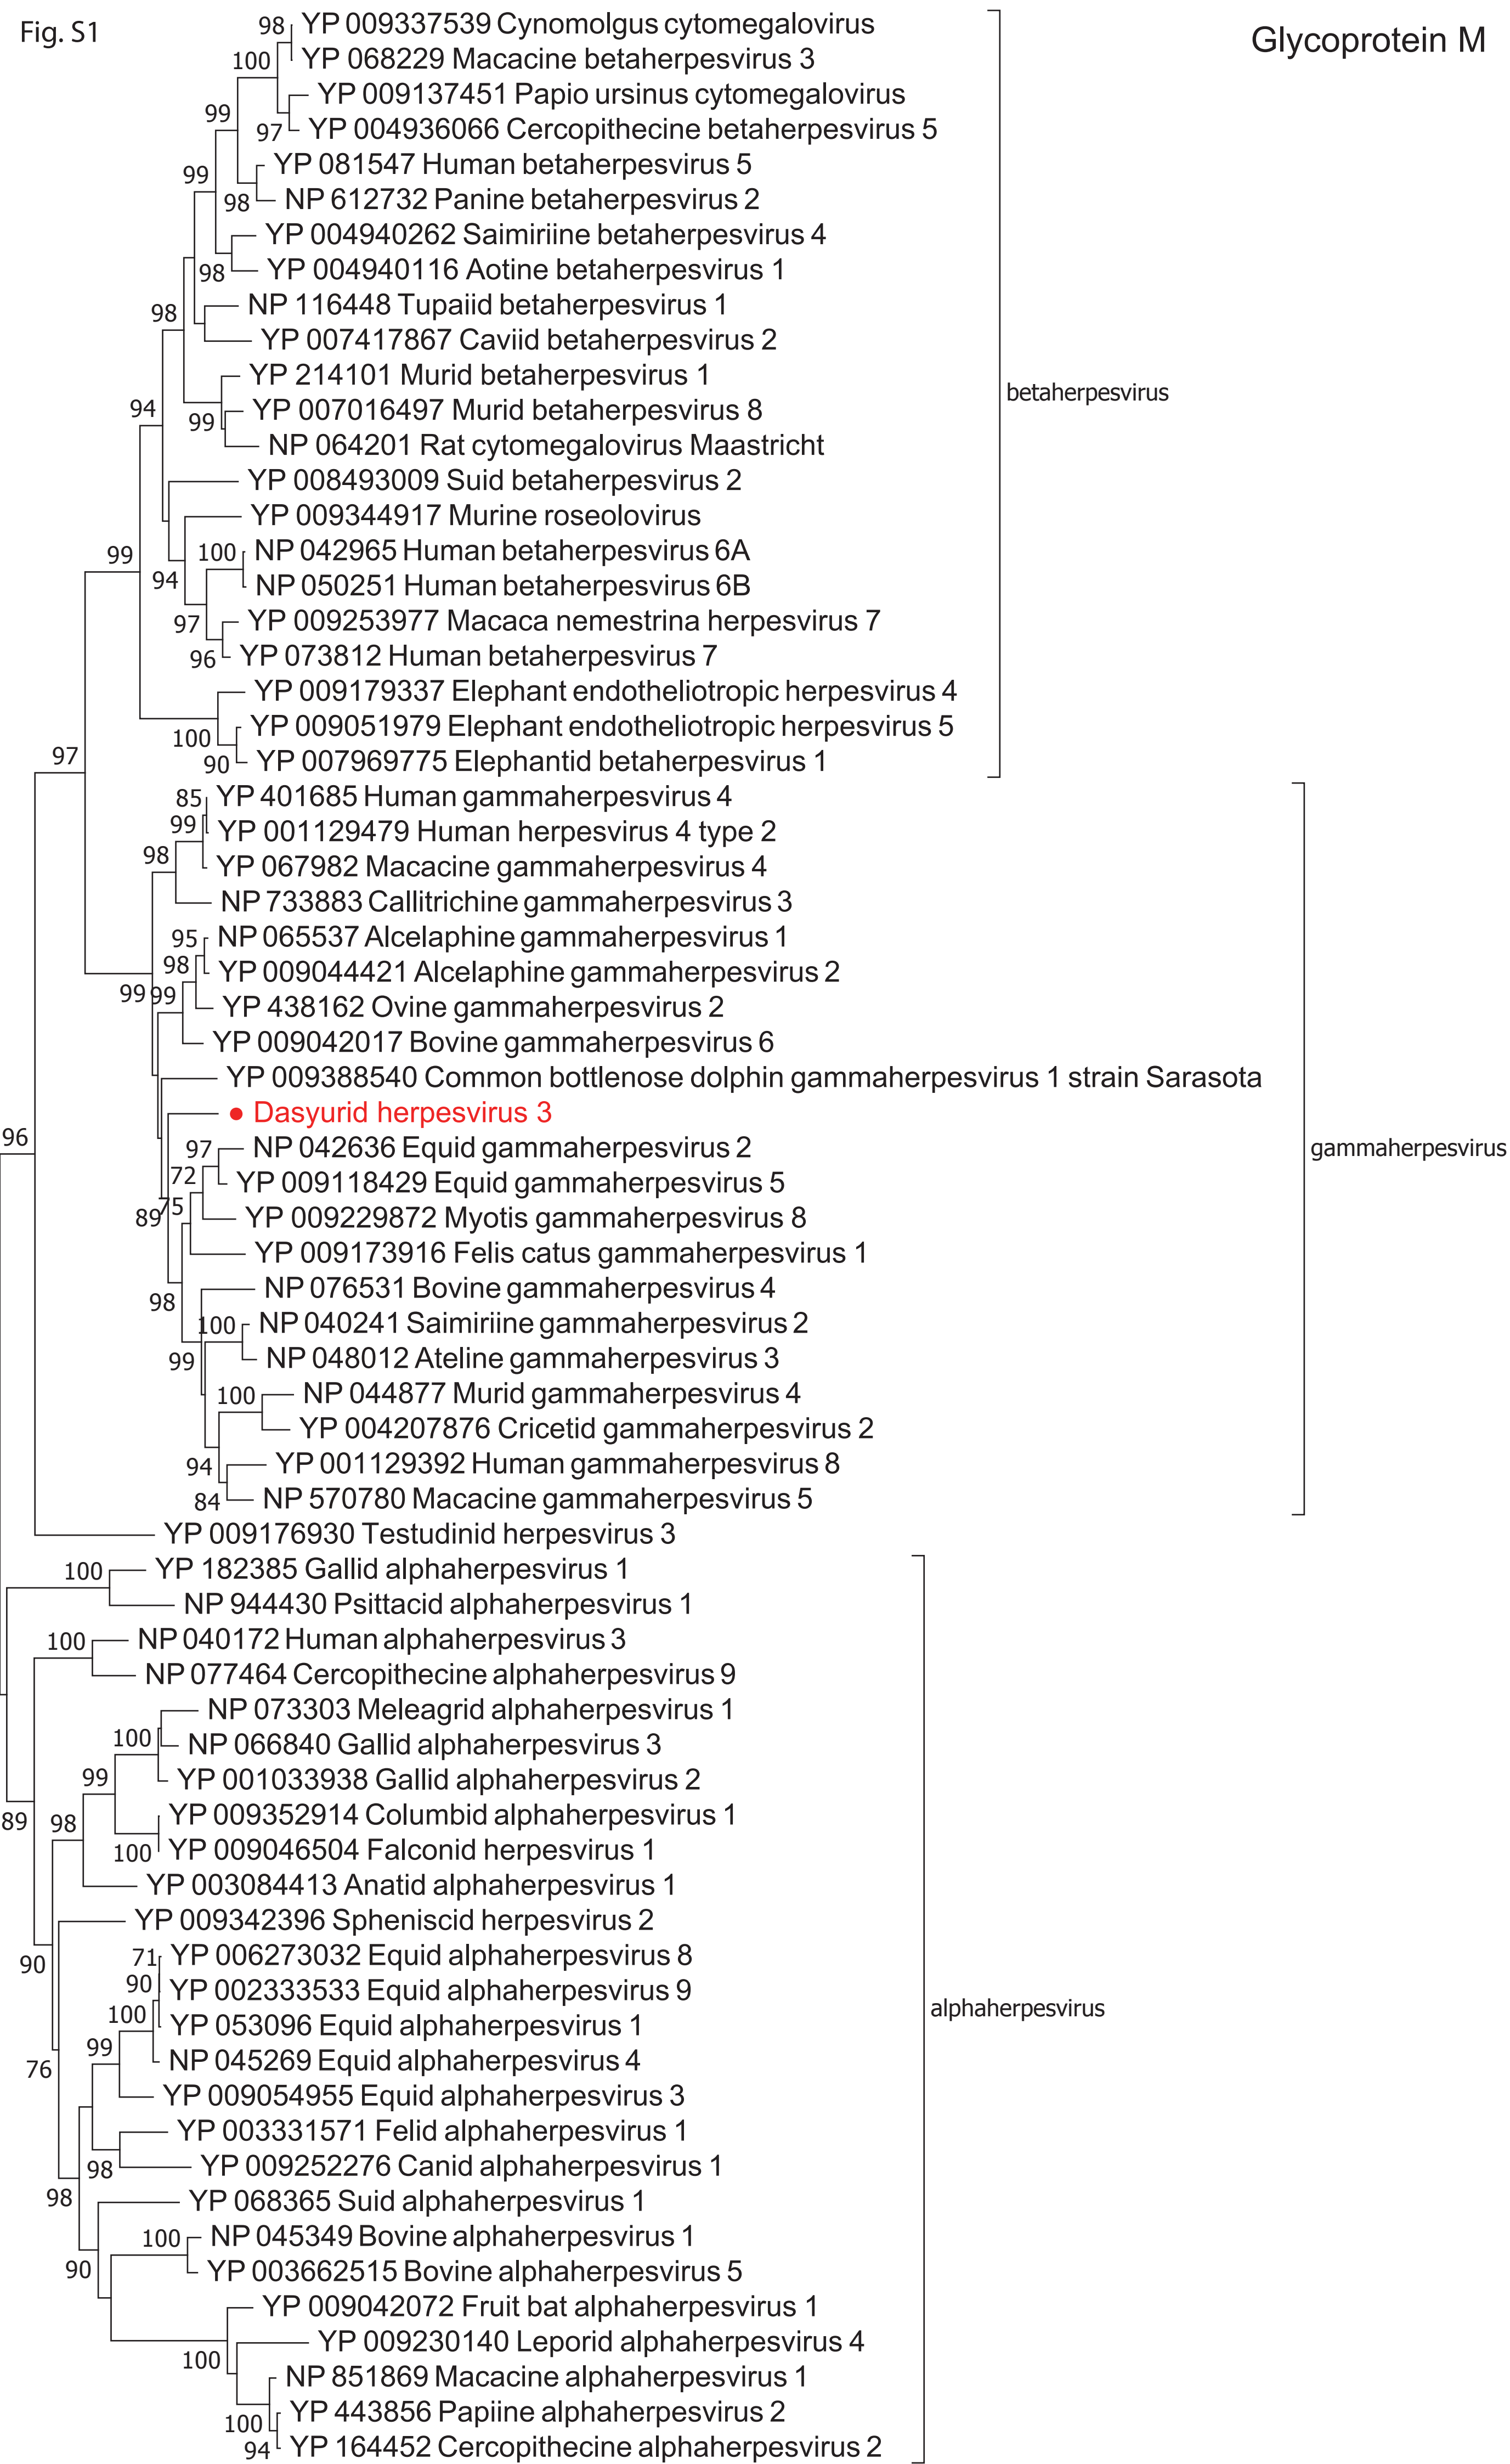

0.5

Fig. S2

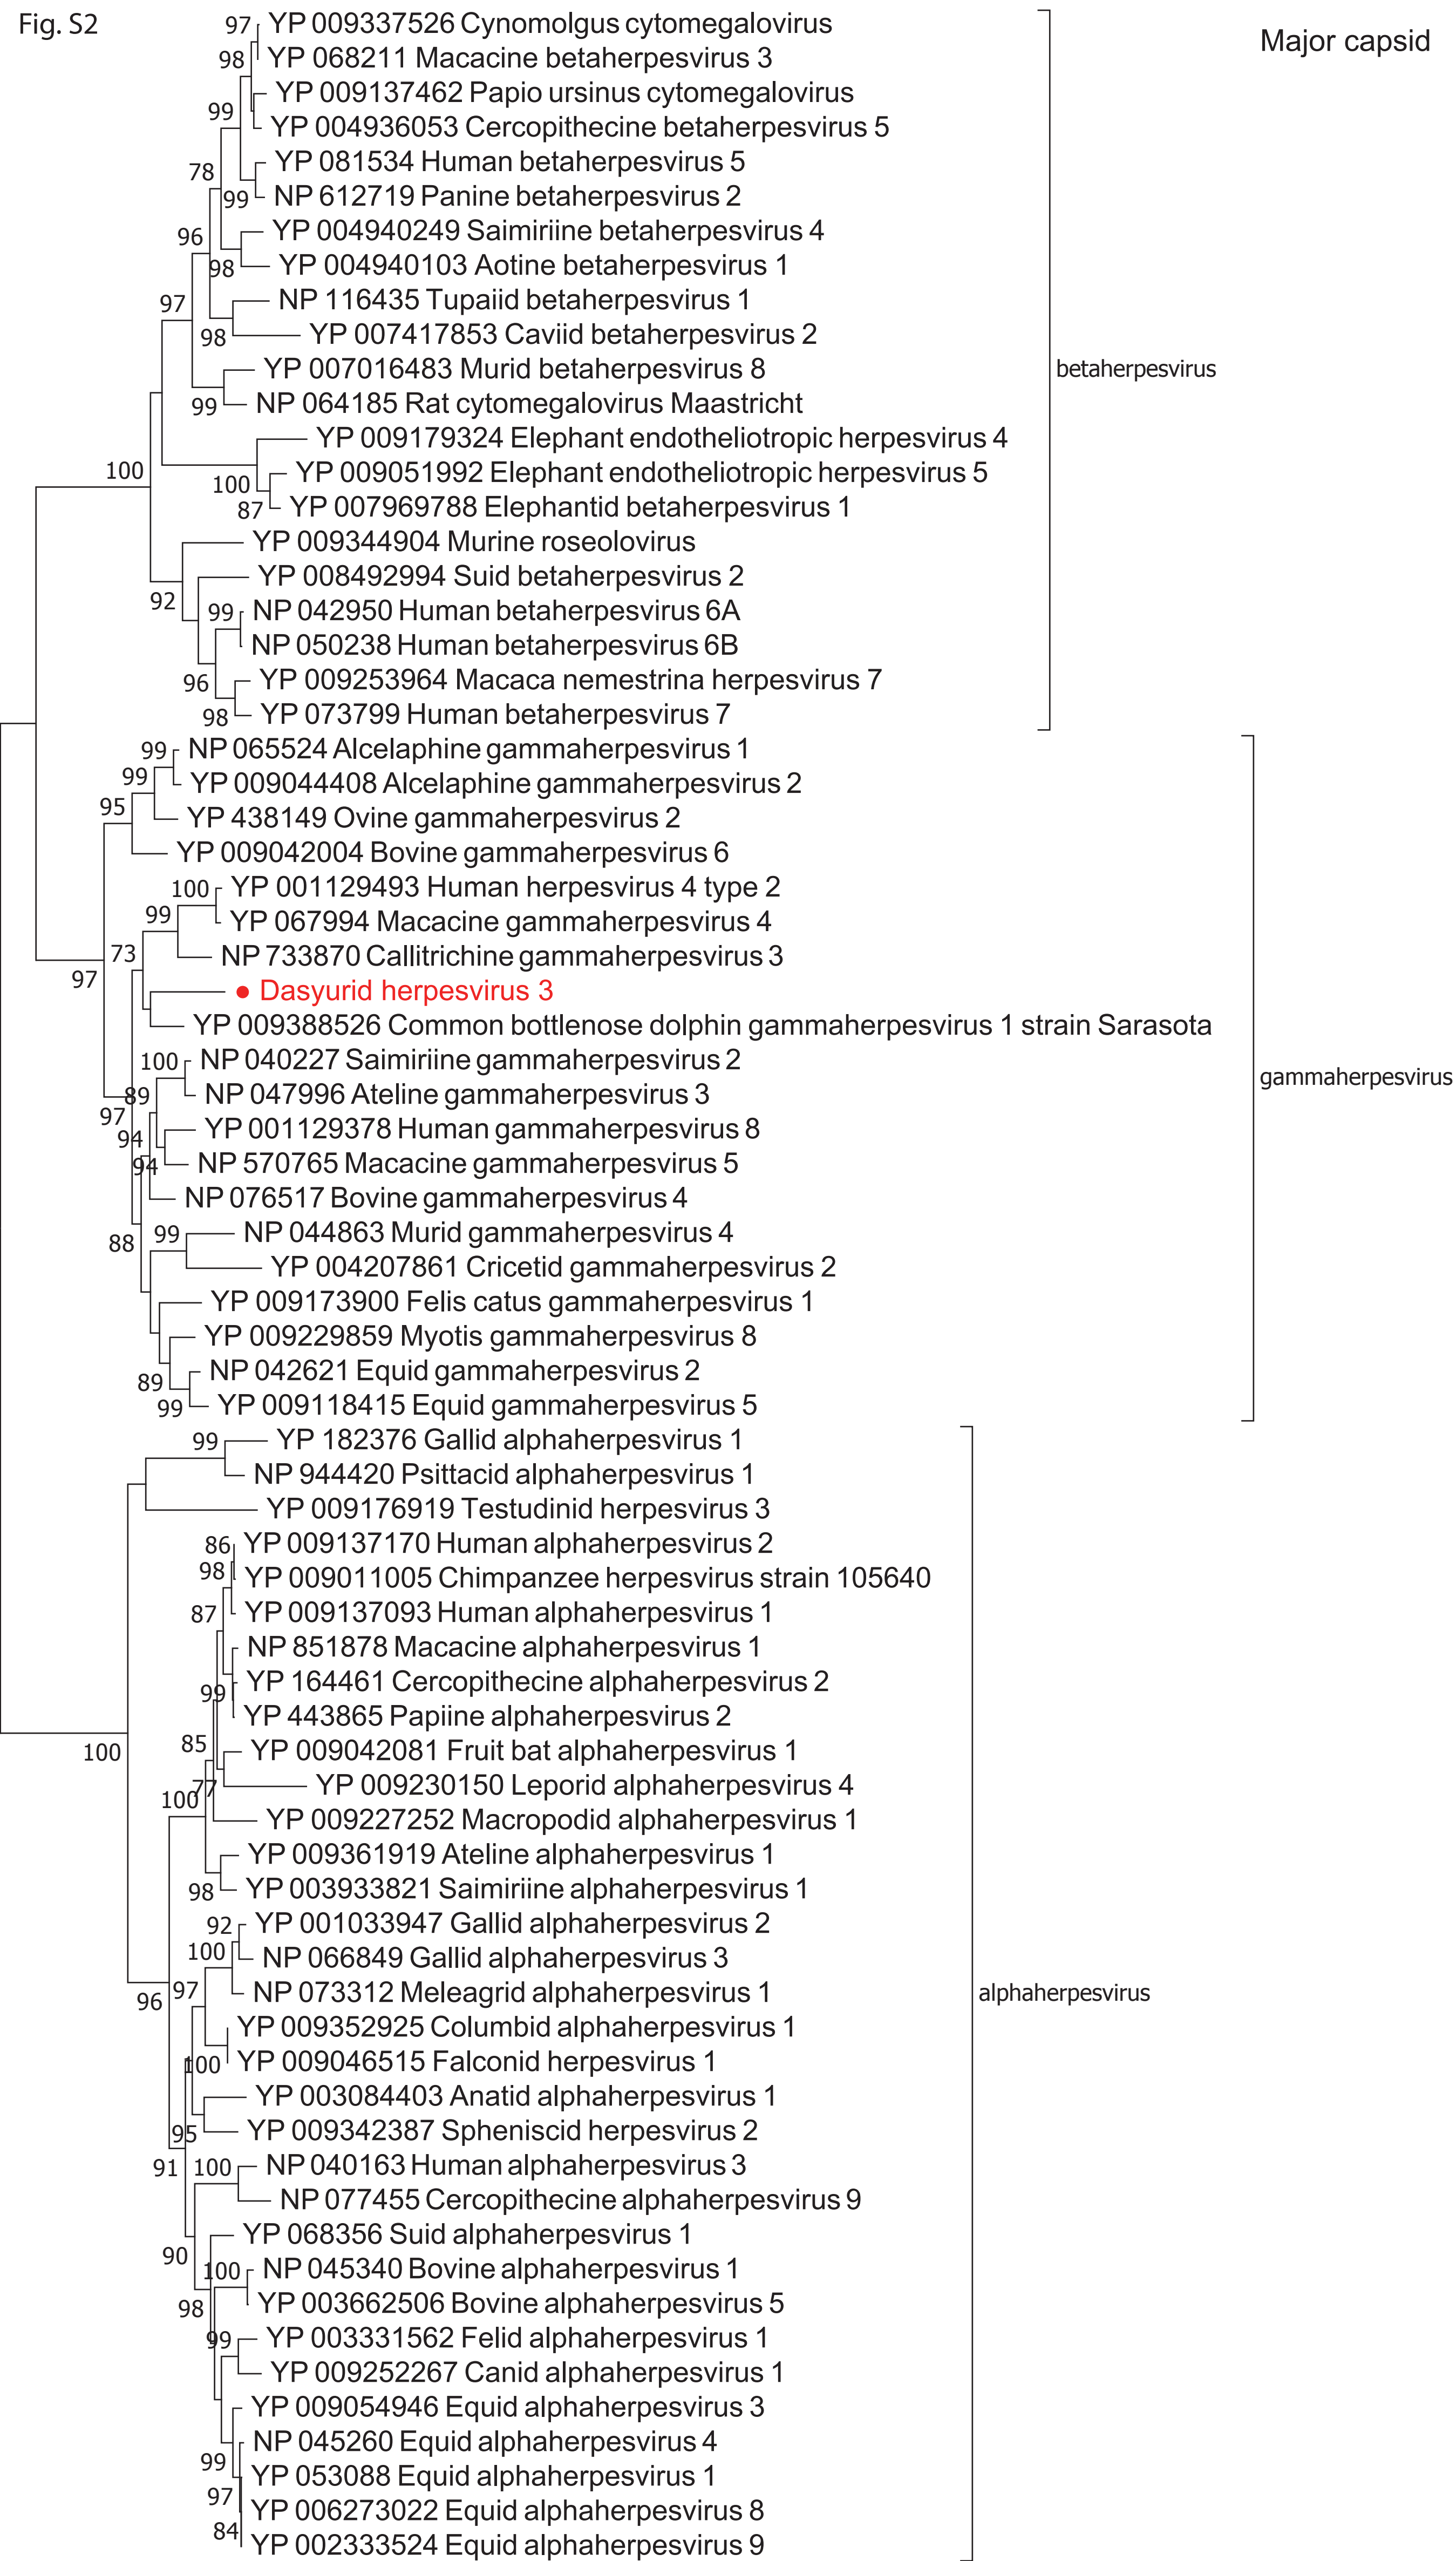



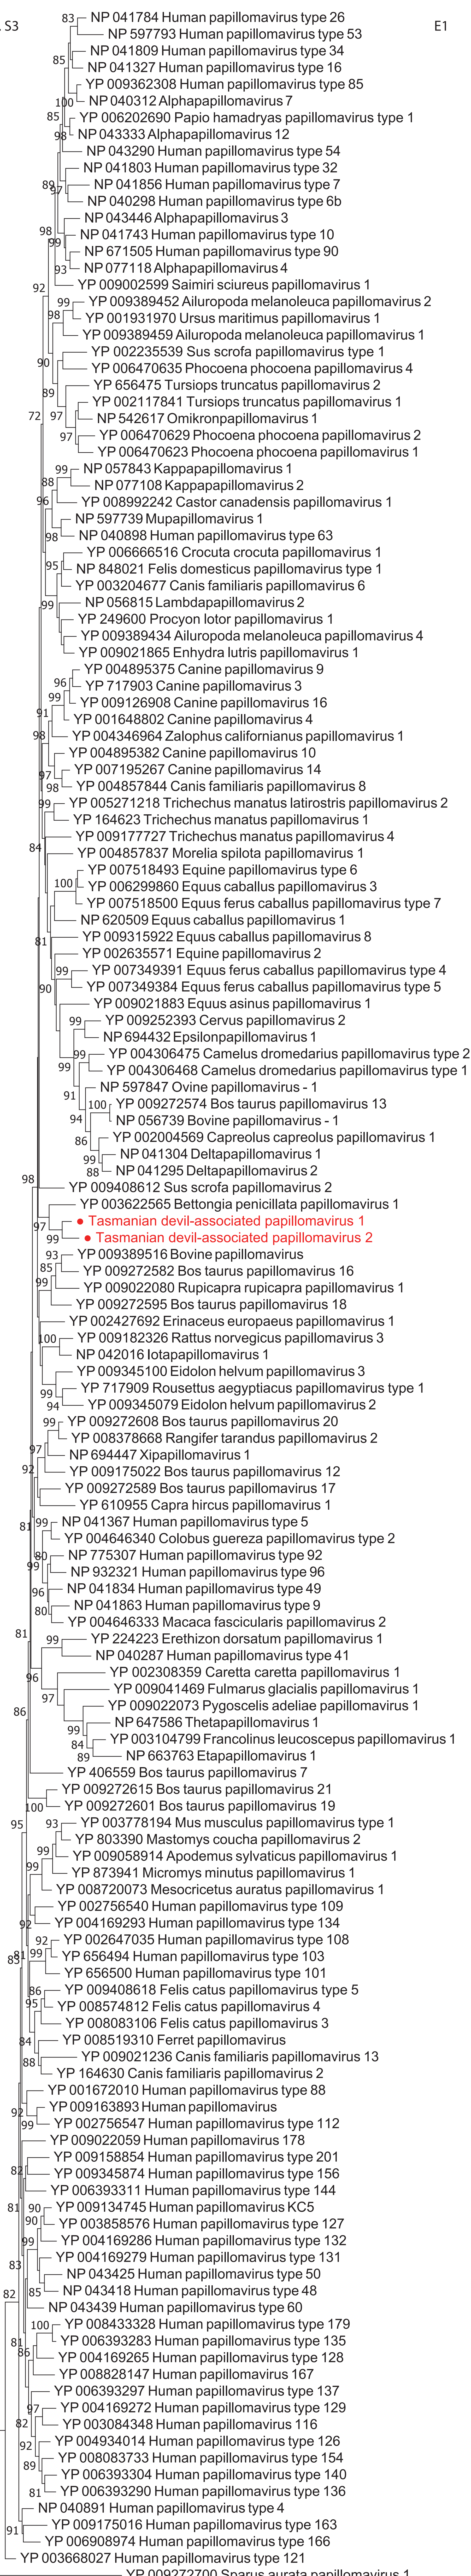



Fig. S4

VP1

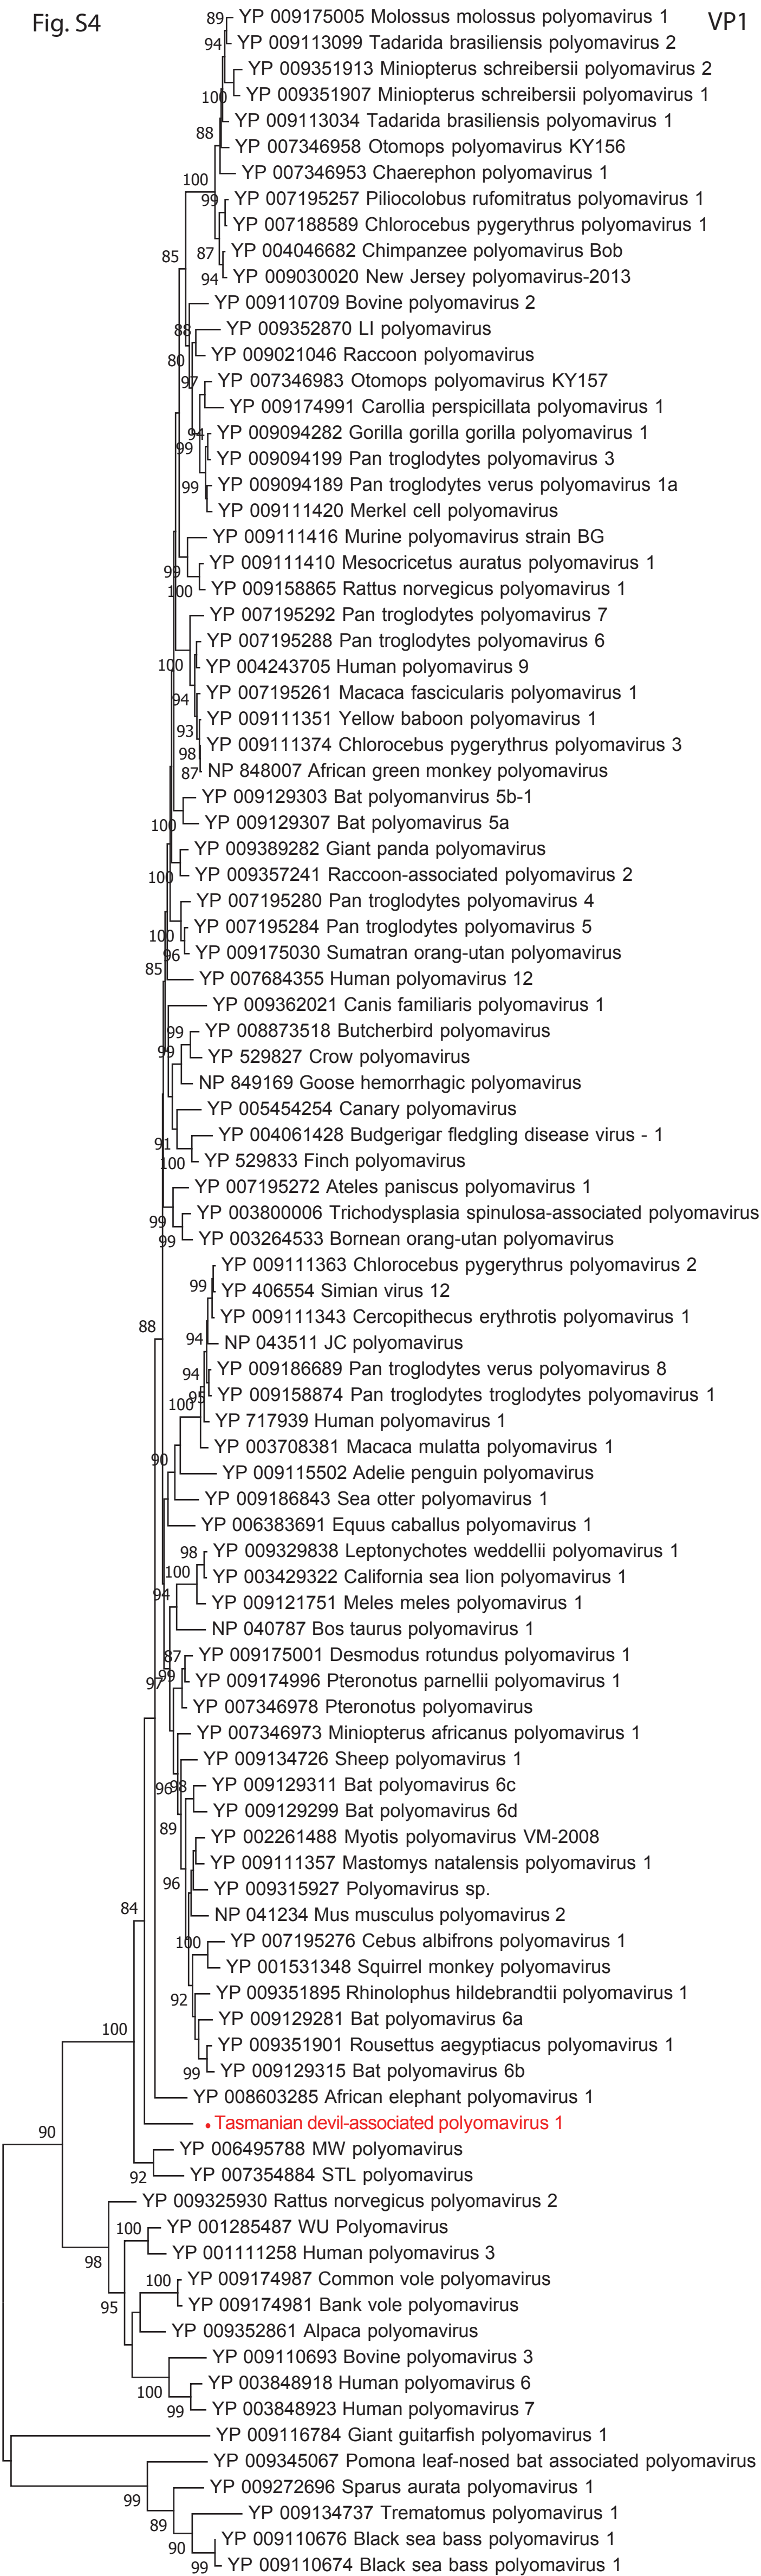

0.5

Fig. S5

LTA<sub>g</sub>

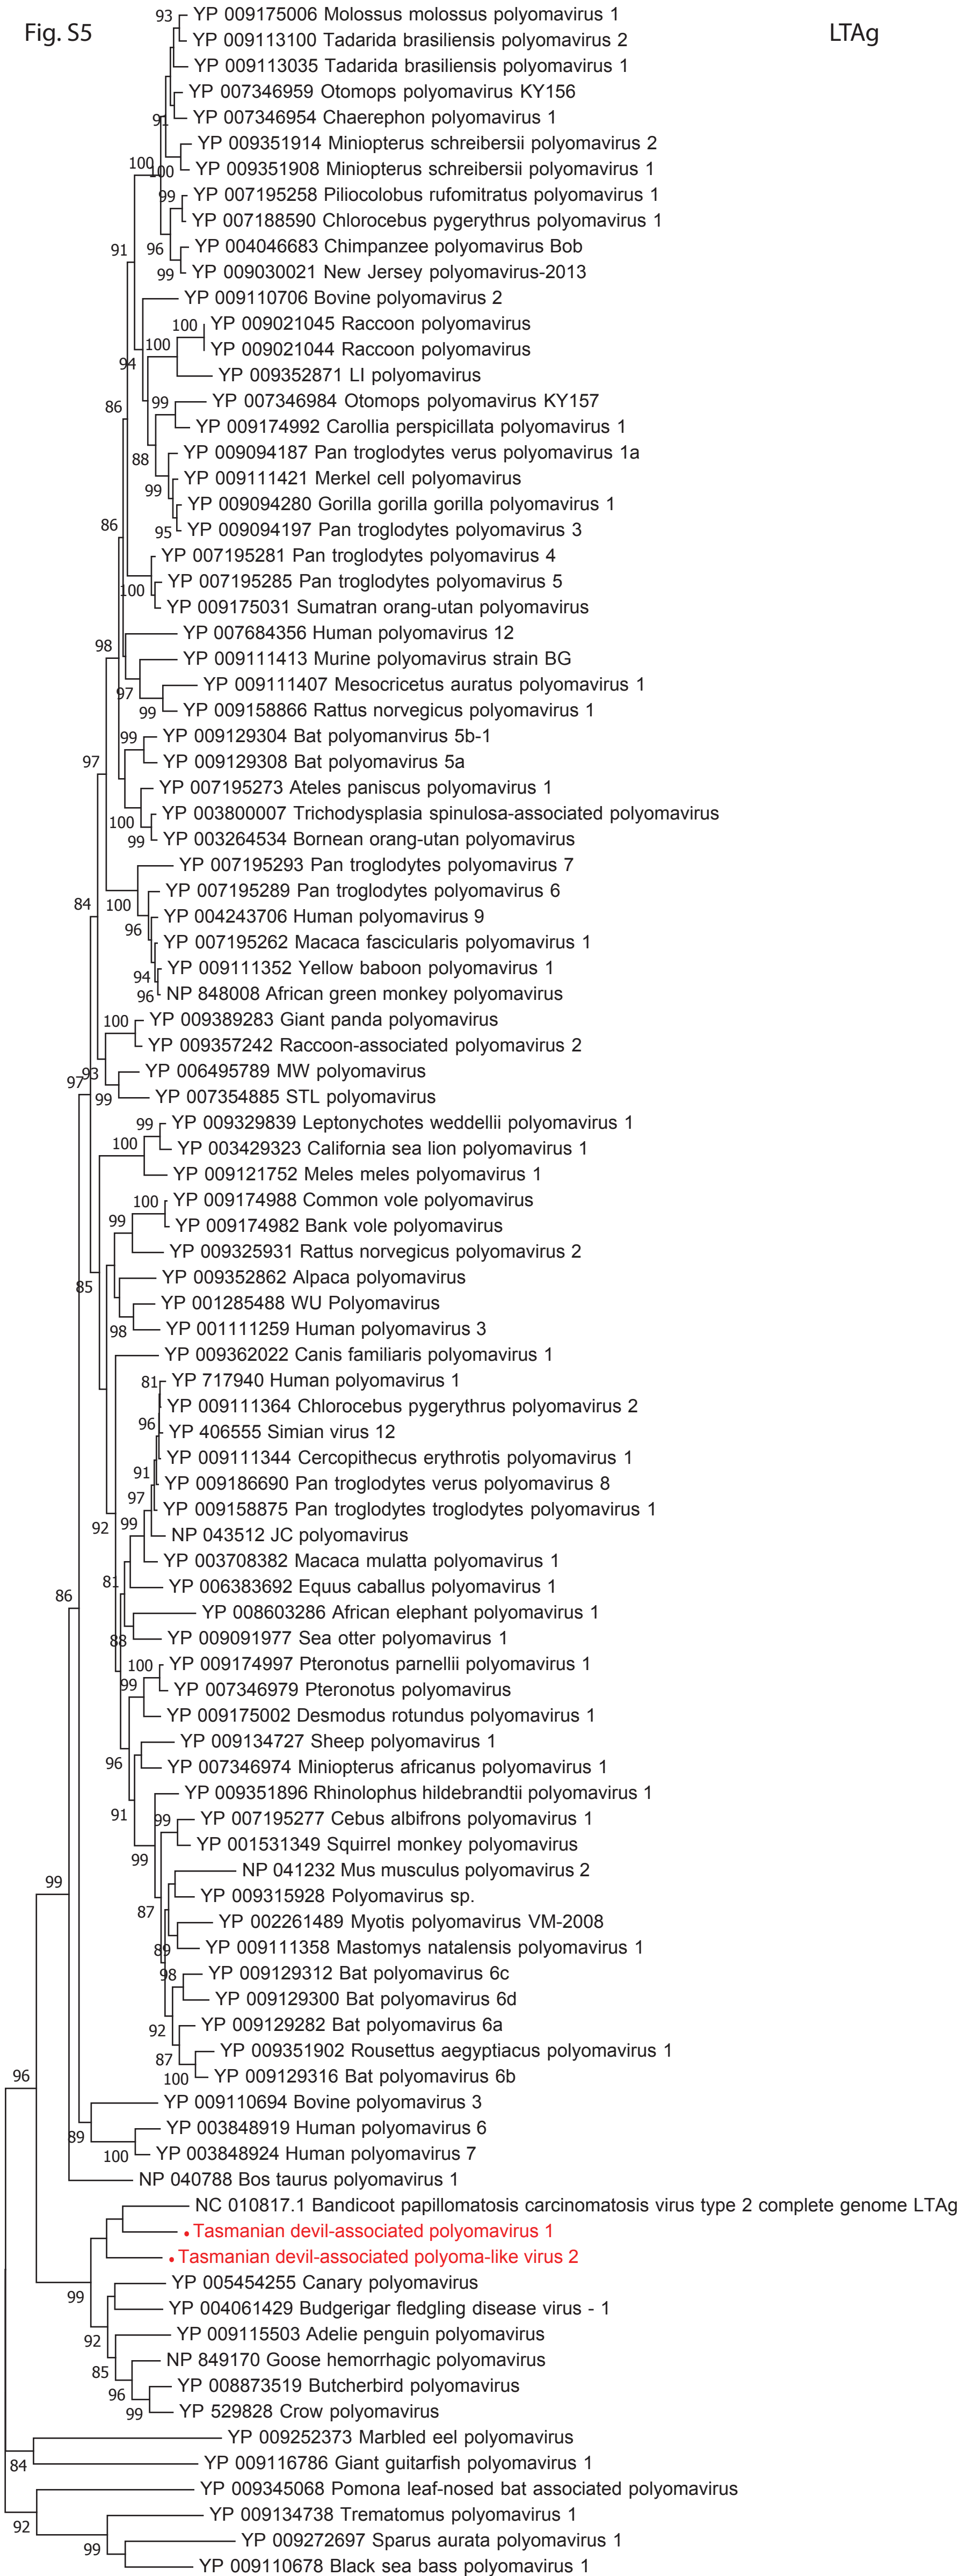

0.5
